# Supplementary material
Source: PubMed Central journal article supplement (PMC9628445)
Supplement: 11764_2022_1276_MOESM1_ESM.pdf [file 11764_2022_1276_MOESM1_ESM.pdf]

## **Integrative Review of School Integration Support following Pediatric Cancer**

Journal of Cancer Survivorship

Elaina Parrillo,<sup>1</sup> Claire Petchler,<sup>1</sup> Lisa A. Jacobson,<sup>2,3</sup> Kathy Ruble,<sup>4</sup> E. Juliana Paré-Blagoev,<sup>5</sup> Marie T. Nolan<sup>1</sup>

<sup>1</sup>Johns Hopkins University School of Nursing, Baltimore, Maryland

<sup>2</sup>Department of Psychiatry and Behavioral Sciences, Johns Hopkins School of Medicine, Baltimore, Maryland

<sup>3</sup>Department of Neuropsychology, Kennedy Krieger Institute, Baltimore, Maryland

<sup>4</sup>Division of Pediatric Oncology, Johns Hopkins School of Medicine, Baltimore, Maryland

<sup>5</sup>Johns Hopkins University School of Education, Baltimore, Maryland

Corresponding Author:

Elaina Parrillo<sup>1</sup>

Email Address: [Eparril2@jh.edu](mailto:Eparril2@jh.edu)

Telephone Number: 518-605-4626

Postal Address: Johns Hopkins University, School of Nursing, 525 N Wolfe St, Baltimore, MD 21205

Orcid ID: 0000-0001-6824-0017

## Supplemental Information

### Search Terms

| Database | Search Terms                                                                                                                                                                                                                                                                                                                                                                                                                                                                                                                                                                                                                                                                                                                                                                                                                                                                              |
|----------|-------------------------------------------------------------------------------------------------------------------------------------------------------------------------------------------------------------------------------------------------------------------------------------------------------------------------------------------------------------------------------------------------------------------------------------------------------------------------------------------------------------------------------------------------------------------------------------------------------------------------------------------------------------------------------------------------------------------------------------------------------------------------------------------------------------------------------------------------------------------------------------------|
| PubMed   | ("Neoplasms"[Mesh] OR neoplas*[tiab] OR cancer*[tiab] OR tumor*[tiab] OR tumour*[tiab] OR carcinoma*[tiab] OR sarcoma*[tiab]) AND ("Adolescent"[Mesh] OR child*[tiab] OR youth*[tiab] OR teen*[tiab] OR adolescen*[tiab] OR pediatric*[tiab]) AND ("Parents"[Mesh] OR parent*[tiab] OR mother*[tiab] OR father*[tiab] OR guardian*[tiab] OR step mother*[tiab] OR step father*[tiab] OR step parent*[tiab]) AND ("Schools"[Mesh:NoExp] OR "middle school" OR "elementary school" OR "high school" OR "middle schools" OR "elementary schools" OR "high schools" OR school*[tiab])                                                                                                                                                                                                                                                                                                         |
| CINAHL   | ((MH "Neoplasms+") OR (neoplas* OR cancer* OR tumor* OR tumour* OR sarcoma* OR carcinoma* )) AND ( (MH "Child") OR (MH "Child, Preschool") OR (MH "Child, Medically Fragile") OR (MH "Child, Institutionalized") OR (MH "Child, Hospitalized") OR (MH "Child, Gifted") OR (MH "Child, Foster") OR (MH "Child, Disabled") OR (MH "Child, Adopted") OR (MH "Child, Abandoned") OR (MH "Only Child") OR (MH "Adolescence+")) AND ( child* OR youth* OR adolescen* OR teen* OR pediatric* ) ) AND ( (MH "Parents+") OR (MH "Stepfamilies")) OR ( parent* OR mother* OR father* OR guardian* OR step-mother* OR step-father* OR stepmother* OR stepfather* OR stepparent* ) ) AND ( (MH "Schools, Elementary") OR (MH "Schools, Middle") OR (MH "Schools, Secondary") OR (MH "Schools") OR (MH "Schools, Special")) OR ( ((elementary OR primary OR middle OR high) N3 school*) OR school* ) ) |
| Embase   | ('neoplasm'/exp OR neoplas*:ti,ab OR cancer*:ti,ab OR tumor*:ti,ab OR tumour*:ti,ab OR sarcoma*:ti,ab OR carcinoma*:ti,ab) AND ('child'/exp OR 'adolescent'/exp OR child*:ti,ab OR youth*:ti,ab OR teen*:ti,ab OR adolescen*:ti,ab OR pediatric*:ti,ab) AND ('parent'/exp OR 'stepparent'/exp OR parent*:ti,ab OR mother*:ti,ab OR father*:ti,ab OR guardian*:ti,ab OR stepparent*:ti,ab OR stepmother*:ti,ab OR stepfather*:ti,ab OR ((step NEAR/2 (father* OR mother* OR parent*)):ti,ab)) AND ('high school'/exp OR 'middle school'/exp OR 'primary school'/exp OR 'nursery school'/exp OR 'kindergarten'/exp OR 'school'/de OR (((elementary OR middle OR primary OR secondary OR high) NEAR/2 school*):ti,ab))                                                                                                                                                                       |
| PsycINFO | (DE "Neoplasms" OR DE "Leukemias" OR DE "Melanoma" OR DE "Metastasis" OR DE "Nervous System Neoplasms" OR "cancer*" OR "sarcoma*" OR "tumor*") AND (DE "Parents" OR "parent*" OR "guardian*") AND (DE "Family" OR "child*" OR "youth*" OR "adolescenc*") AND (DE "Schools" OR "school*")                                                                                                                                                                                                                                                                                                                                                                                                                                                                                                                                                                                                  |
